# Supplementary material for: Aqueous dispersions of oligomer-grafted carbon nanomaterials with controlled surface charge and minimal framework damage
Source: Royal Society of Chemistry journal article supplement (doi:10.1039/c4fd00116h), 2014-01-01
Supplement: c4fd00116h1.pdf [file c4fd00116h1.pdf]

# Aqueous dispersions of oligomer-grafted carbon nanomaterials with controlled surface charge and minimal framework damage

---

Sheng Hu,<sup>a</sup> Shu Chen,<sup>b</sup> Robert Menzel,<sup>a</sup> Angela D. Goode,<sup>b</sup> Mary P. Ryan,<sup>b</sup>  
Alexandra E. Porter<sup>b</sup> and Milo S. P. Shaffer<sup>a1</sup>

<sup>a</sup>*Department of Chemistry and London Centre for Nanotechnology, Imperial College London,  
Exhibition Road, London SW7 2AZ, UK*

<sup>b</sup>*Department of Materials and London Centre for Nanotechnology, Imperial College London,  
Exhibition Road, London SW7 2AZ, UK*

---

<sup>1</sup> *Corresponding author. Department of Chemistry and London Centre for Nanotechnology, Imperial College London, Exhibition Road, London SW7 2AZ, UK. E-mail addresses: m.shaffer@imperial.ac.uk (M.S. P. Shaffer)*

Table 1. Washing solvent used for each grafted reagent

| Grafted Compound (chemical name)                | Washing solvent          |
|-------------------------------------------------|--------------------------|
| 3-Sulfopropyl methacrylate potassium salt       | H <sub>2</sub> O/Ethanol |
| (3-Acrylamidopropyl) trimethylammonium chloride | H <sub>2</sub> O/Ethanol |
| Methacrylic acid                                | Acetone                  |
| N-methyl 4-vinylpyridine iodide                 | Methanol                 |
| Poly (ethyleneglycol) methacrylate              | Ethanol                  |
| 1-Iodododecane                                  | Toluene                  |

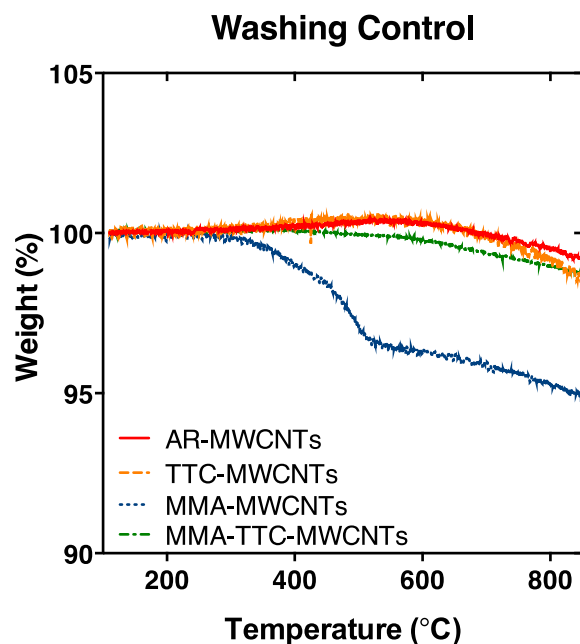

Figure S1. TGA weight loss profiles of as-received (AR) MWCNTs, thermal treated control (TTC) MWCNTs and MMA treated TTC-MWCNT, heated in N<sub>2</sub> atmosphere with a 10 °C/min ramping rate from 100 °C to 850 °C.

In order to establish whether the washing-up procedure can effectively remove unreacted monomers, a control of treating TTC-MWCNT with MMA monomer for overnight stirring at room temperature, followed by standard workup, has been carried out.

50 mg of TTC-Arkema was added to 4 mL of purified MMA monomer, the mixture was stirred overnight at room temperature for overnight. The unreacted reactant was removed via filtration through a 0.45 µm pore size polytetrafluoroethylene (PTFE) membrane (Whatman, UK) under vacuum. The product was thoroughly washed with 3 × 45 mL of Acetone then dispersed in 45 mL of solvent and bath sonicated (USC300T, 45kHz, 80W, VWR International, USA) for 15 minutes. The filtration-sonication cycle was repeated three times.

TGA analysis indicated no weight loss of MMA treated TTC-MWCNTs, unreacted monomer was efficiently removed with less than 0.2 % of MMA leftover.
